# Supplementary material for: Caenorhabditis elegans Histone Methyltransferase MET-2 Shields the Male X Chromosome from Checkpoint Machinery and Mediates Meiotic Sex Chromosome Inactivation
Source: PLoS Genet. 2011 Sep 1;7(9):e1002267. doi: 10.1371/journal.pgen.1002267 (PMC3164706; doi:10.1371/journal.pgen.1002267)
Supplement: Table S1 — Candidate genes surveyed for CED-1::GFP(+) nuclei. Apoptotic bodies were scored by quantifying CED-1::GFP expressing nuclei per gonad arm. A minimum of 24 gonad arms was scored for each genotype. Animals were screened by picking either L4 wild-type XX hermaphrodites or young adult fem-3(lf) X0 females expressing CED-1::GFP to RNAi feeding plates (see Materials and Methods) and scored after approx. 48 hrs. syp-1(RNAi) and him-8(RNAi) were used as positive controls in fem-3(lf) X0 and wild-type XX germ lines, respectively. Data shown are means ± S.E.M., and statistical comparisons between RNAi knockdown and empty L4440 vector were determined using a two-tailed Mann-Whitney test; ** denotes p<0.05; * denotes p<0.001. Abbreviations: SC, synaptonemal complex; CO, crossover; PC, pairing center; HP, heterochromatin protein; HAT, histone acetyltransferase; HDAC, histone deacetylase; HMT, histone methyltransferase; HDMT, histone demethylase. (XLS) [file pgen.1002267.s008.xls]

## Sheet: apoptotic bodies
Table S1. Candidate genes surveyed for CED-1::GFP(+) nuclei
		# Apoptotic bodies/gonad
RNAi	Description/Relevant Function	wild-type XX	fem-3(lf) X0
L4440	N/A	6.5±0.1	2.5±0.1
syp-1	SC central region protein; promotes chromosome synapsis	N.D.	4.1±0.2*
him-8	C2H2 zinc-finger protein; promotes X chromosome pairing	9.5±0.6*	N.D.
	ATP-dependent chromatin remodeling
snfc-5	SNF5/Ini1homolog	7.8±0.5**	2.7±0.3
ZK1128.5	SBAP60 homolog; SWI/SNF related	7.0±0.7	3.5±0.3*
rba-1	NURF55/RbAp48/CAF1 ortholog	7.5±0.6	3.9±0.4*
lin-53	NURF55/RbAp48/CAF1 ortholog	6.5±0.4	3.6±0.4**
mep-1	C2H2 zinc-finger protein/NuRD complex component	11.0±0.6*	6.1±0.6*
	SET domain
set-1	Set domain protein	10.1±-0.6*	3.7±0.3*
set-2	Set1 ortholog; H3K4 methylation	8.5±0.7**	3.0±0.3
set-17	PRDM11/PRDM7 orthology	8.3±0.5*	3.3±0.3**
met-1	Set2 homolog; H3K36 methylation	5.5±0.3**	4.4±0.2*
met-2	SETDB1 homolog; H3K9 methylation	6.1±0.2	4.1±0.2*
	HDMTs
spr-5	LSD1 ortholog; H3K4 demethylation	12.0±0.9*	4.4±0.4*
lsd-1	LSD1 ortholog; H3K4 demethylation	8.6±0.9**	4.3±0.4*
	Polycomb group-related
mes-2	Enhancer of zeste (EZH2) ortholog; H3K27 methylation	7.0±0.4	4.7±0.2*
mes-3	H3K27 methylation	10.0±0.8*	3.0±0.2**
mes-6	Extra sex combs (Esc) ortholog; H3K27 methylation	7.1±0.4	3.6±0.3*
mes-4	H3K36 methylation	9.7±0.7*	3.9±0.3*
sop-2	SAM domain protein	8.0±0.6**	3.7±0.3*
	HDACS
hda-1	HDAC1 ortholog/NURD complex component	11.0±0.7*	4.8±0.4*
hda-2	Class I HDAC; maintanence of genome stability	7.2±0.8	3.5±0.3**
	Other
dpy-30	COMPASS complex protein; histone methylation/dosage compensation	7.5±0.7	2.5±0.2
cbp-1	transcriptional cofactor CBP/p300 ortholog; histone acetylation	7.0±0.4	2.6±0.2
him-17	THAP domain chromatin-binding protein;promotes DSB formation and H3K9me2 accumulation during meiotic prophase	11.0±0.7*	3.9±0.3*
swd-3.1	histone methylation subunit WDR5; H3K4 trimethylation	9.0±0.6*	1.5±0.1*
hpl-1	HP1 homolog; H3K9 methylation	8.7±0.6*	2.7±0.2
hpl-2	HP1 homolog; H3K9 methylation	9.0±0.6*	4.8±0.4*
his-24	histone H1 isoform (H1.1); regulation of histone H3 methylation	8.2±0.5**	3.0±0.3
ubc-9	E2 SUMO-conjugating enzyme/Ubc9p ortholog; DNA damage/repair checkpoint	8.2±0.7**	3.3±0.3**
usp-48	ubiquitin-specific protease	8.0±0.8**	4.0±0.2*
D2096.8	Nucleosome assembly protein	7.2±0.4	3.2±0.3
Apoptotic bodies were scored by quantifying CED-1::GFP expressing nuclei per gonad arm. A minimum of 24 gonad arms were scored for each genotype. Animals were screened by picking either L4 wild-type XX hermaphrodites or young adult fem-3(lf) X0 females expressing CED-1::GFP to RNAi feeding plates (see Materials and Methods) and were scored after approx. 48 hrs. syp-1(RNAi) and him-8(RNAi) were us…
